# Supplementary material for: Tracking the evolution of the SARS-CoV-2 Delta variant of concern: analysis of genetic diversity and selection across the whole viral genome
Source: Front Microbiol. 2023 Aug 8;14:1222301. doi: 10.3389/fmicb.2023.1222301 (PMC10443222; doi:10.3389/fmicb.2023.1222301)
Supplement: Supplementary file 6 [file Data_Sheet_5.XLSX]

## Sheet: Sheet1
Group	Genome region	Gene position (nucleotide)	Gene position (amino acid)	Full genome position (nucleotide)	Mutation occurance count	Percentage of group affected (occurance / 447)	Original nucleotide (in reference genome)	Mutated nucleotide	Codon change	Amino acid change	Mutation type	FUBAR positive or negative selection	Notes
C	ORF1a	160	54	425	7	1.566	G	A	GUA-AUA	V-I	Non-synonymous
C	ORF1a	264	88	529	8	1.78971	G	U	CUG-CUU	L-L	Synonymous
C	ORF1a	421	141	686	5	1.11857	A	Gap	AAG- ---	K-	Deletion		NSP1 9nt deletion at gene position 686-694, documented in previous literature at https://translational-medicine.biomedcentral.com/articles/10.1186/s12967-020-02507-5 ; not associated with expected Delta mutations
C	ORF1a	422	141	687	5	1.11857	A	Gap	AAG- ---	K-	Deletion		NSP1 9nt deletion at gene position 686-694, documented in previous literature at https://translational-medicine.biomedcentral.com/articles/10.1186/s12967-020-02507-5 ; not associated with expected Delta mutations
C	ORF1a	423	141	688	5	1.11857	G	Gap	AAG- ---	K-	Deletion		NSP1 9nt deletion at gene position 686-694, documented in previous literature at https://translational-medicine.biomedcentral.com/articles/10.1186/s12967-020-02507-5 ; not associated with expected Delta mutations
C	ORF1a	424	142	689	5	1.11857	U	Gap	UCA- ---	S-	Deletion		NSP1 9nt deletion at gene position 686-694, documented in previous literature at https://translational-medicine.biomedcentral.com/articles/10.1186/s12967-020-02507-5 ; not associated with expected Delta mutations
C	ORF1a	425	142	690	5	1.11857	C	Gap	UCA- ---	S-	Deletion		NSP1 9nt deletion at gene position 686-694, documented in previous literature at https://translational-medicine.biomedcentral.com/articles/10.1186/s12967-020-02507-5 ; not associated with expected Delta mutations
C	ORF1a	426	142	691	5	1.11857	A	Gap	UCA- ---	S-	Deletion		NSP1 9nt deletion at gene position 686-694, documented in previous literature at https://translational-medicine.biomedcentral.com/articles/10.1186/s12967-020-02507-5 ; not associated with expected Delta mutations
C	ORF1a	427	143	692	5	1.11857	U	Gap	UUU- ---	F-	Deletion		NSP1 9nt deletion at gene position 686-694, documented in previous literature at https://translational-medicine.biomedcentral.com/articles/10.1186/s12967-020-02507-5 ; not associated with expected Delta mutations
C	ORF1a	428	143	693	5	1.11857	U	Gap	UUU- ---	F-	Deletion		NSP1 9nt deletion at gene position 686-694, documented in previous literature at https://translational-medicine.biomedcentral.com/articles/10.1186/s12967-020-02507-5 ; not associated with expected Delta mutations
C	ORF1a	429	143	694	5	1.11857	U	Gap	UUU- ---	F-	Deletion		NSP1 9nt deletion at gene position 686-694, documented in previous literature at https://translational-medicine.biomedcentral.com/articles/10.1186/s12967-020-02507-5 ; not associated with expected Delta mutations
C	ORF1a	564	188	829	6	1.34228	C	U	AAC-AAU	N-N	Synonymous
C	ORF1a	570	190	835	14	3.13199	C	U	UUC-UUU	F-F	Synonymous	Negative
C	ORF1a	648	216	913	24	5.36913	C	U	UCC-UCU	S-S	Synonymous
C	ORF1a	795	265	1060	9	2.01342	C	U	ACC-ACU	T-T	Synonymous
C	ORF1a	926	309	1191	147	32.8859	C	U	CCA-CUA	P-L	Non-synonymous	Positive	Expected Delta mutation
C	ORF1a	1002	334	1267	147	32.8859	C	U	GGC-GGU	G-G	Synonymous		Expected Delta mutation
C	ORF1a	1647	549	1912	6	1.34228	C	U	UCC-UCU	S-S	Synonymous
C	ORF1a	1772	591	2037	6	1.34228	C	U	GCU-GUU	A-V	Non-synonymous
C	ORF1a	2188	730	2453	10	2.23714	C	U	CUC-UUC	L-F	Non-synonymous
C	ORF1a	2244	748	2509	16	3.57942	C	U	CCC-CCU	P-P	Synonymous	Negative
C	ORF1a	2772	924	3037	447	100	C	U	UUC-UUU	F-F	Synonymous
C	ORF1a	2976	992	3241	7	1.566	C	U	GAC-GAU	D-D	Synonymous
C	ORF1a	3002	1001	3267	24	5.36913	C	U	ACU-AUU	T-I	Non-synonymous
C	ORF1a	3192	1064	3457	109	24.3848	C	U	UAC-UAU	Y-Y	Synonymous
C	ORF1a	3609	1203	3874	11	2.46085	C	U	AUC-AUU	I-I	Synonymous	Negative
C	ORF1a	3897	1299	4162	7	1.566	G	U	GUG-GUU	V-V	Synonymous	Negative
C	ORF1a	3916	1306	4181	45	10.0671	G	U	GCU-UCU	A-S	Non-synonymous
C	ORF1a	4700	1567	4965	107	23.9374	C	U	ACU-AUU	T-I	Non-synonymous
C	ORF1a	4919	1640	5184	189	42.2819	U	C	CCU-CUU	P-L	Non-synonymous		Expected Delta mutation
C	ORF1a	5123	1708	5388	24	5.36913	C	A	GCU-GAU	A-D	Non-synonymous
C	ORF1a	5268	1756	5533	5	1.11857	A	G	GGA-GGG	G-G	Synonymous
C	ORF1a	5274	1758	5539	6	1.34228	G	A	CAG-CAA	Q-Q	Synonymous
C	ORF1a	5319	1773	5584	50	11.1857	A	G	ACA-ACG	T-T	Synonymous	Negative
C	ORF1a	5721	1907	5986	26	5.81655	C	U	UUC-UUU	F-F	Synonymous	Negative
C	ORF1a	6137	2046	6402	46	10.2908	C	U	CCA-CUA	P-L	Non-synonymous	Positive
C	ORF1a	6184	2062	6449	9	2.01342	C	U	CUU-UUU	L-F	Non-synonymous
C	ORF1a	6274	2092	6539	35	7.82998	C	U	CAC-UAC	H-Y	Non-synonymous	Positive	Expected Delta mutation
C	ORF1a	6486	2162	6751	9	2.01342	C	U	AAC-AAU	N-N	Synonymous	Negative
C	ORF1a	6689	2230	6954	24	5.36913	U	C	AUA-ACA	I-T	Non-synonymous
C	ORF1a	6859	2287	7124	45	10.0671	C	U	CCU-UCU	P-S	Non-synonymous
C	ORF1a	6900	2300	7165	34	7.60626	C	U	ACC-ACU	T-T	Synonymous
C	ORF1a	7066	2356	7331	9	2.01342	G	A	GUA-AUA	V-I	Non-synonymous
C	ORF1a	8226	2742	8491	6	1.34228	G	A	UUG-UUA	L-L	Synonymous
C	ORF1a	8652	2884	8917	5	1.11857	C	U	UUC-UUU	F-F	Synonymous
C	ORF1a	8721	2907	8986	45	10.0671	C	U	GAC-GAU	D-D	Synonymous
C	ORF1a	8788	2930	9053	45	10.0671	G	U	GUA-UUA	V-L	Non-synonymous
C	ORF1a	8938	2980	9203	27	6.04027	G	A	GAU-AAU	D-N	Non-synonymous
C	ORF1a	9124	3042	9389	5	1.11857	G	A	GAC-AAC	D-N	Non-synonymous
C	ORF1a	9294	3098	9559	5	1.11857	C	U	UAC-UAU	Y-Y	Synonymous	Negative
C	ORF1a	9413	3138	9678	27	6.04027	U	C	UUC-UCC	F-S	Non-synonymous
C	ORF1a	9626	3209	9891	219	48.9933	U	C	GCU-GUU	A-V	Non-synonymous		Expected Delta mutation
C	ORF1a	9764	3255	10029	49	10.962	C	U	ACC-AUC	T-I	Non-synonymous
C	ORF1a	10185	3395	10450	5	1.11857	C	U	CCC-CCU	P-P	Synonymous
C	ORF1a	10740	3580	11005	13	2.90828	C	A	CAC-CAA	H-Q	Non-synonymous	Positive
C	ORF1a	10936	3646	11201	152	34.0045	A	G	ACU-GCU	T-A	Non-synonymous
C	ORF1a	11023	3675	11288	21	4.69799	U	Gap	UCU- ---	S-	Deletion		9nt deletion at ORF1a amino acid positions 3675-3677 in Alpha, Beta, Gamma VOCs https://www.medrxiv.org/content/medrxiv/early/2021/02/01/2021.01.28.21250486.full.pdf ; not associated with expected Delta mutations
C	ORF1a	11024	3675	11289	21	4.69799	C	Gap	UCU- ---	S-	Deletion		9nt deletion at ORF1a amino acid positions 3675-3677 in Alpha, Beta, Gamma VOCs https://www.medrxiv.org/content/medrxiv/early/2021/02/01/2021.01.28.21250486.full.pdf ; not associated with expected Delta mutations
C	ORF1a	11025	3675	11290	21	4.69799	U	Gap	UCU- ---	S-	Deletion		9nt deletion at ORF1a amino acid positions 3675-3677 in Alpha, Beta, Gamma VOCs https://www.medrxiv.org/content/medrxiv/early/2021/02/01/2021.01.28.21250486.full.pdf ; not associated with expected Delta mutations
C	ORF1a	11026	3676	11291	19	4.25056	G	Gap	GGU- ---	G-	Deletion		9nt deletion at ORF1a amino acid positions 3675-3677 in Alpha, Beta, Gamma VOCs https://www.medrxiv.org/content/medrxiv/early/2021/02/01/2021.01.28.21250486.full.pdf ; not associated with expected Delta mutations
C	ORF1a	11027	3676	11292	19	4.25056	G	Gap	GGU- ---	G-	Deletion		9nt deletion at ORF1a amino acid positions 3675-3677 in Alpha, Beta, Gamma VOCs https://www.medrxiv.org/content/medrxiv/early/2021/02/01/2021.01.28.21250486.full.pdf ; not associated with expected Delta mutations
C	ORF1a	11028	3676	11293	19	4.25056	U	Gap	GGU- ---	G-	Deletion		9nt deletion at ORF1a amino acid positions 3675-3677 in Alpha, Beta, Gamma VOCs https://www.medrxiv.org/content/medrxiv/early/2021/02/01/2021.01.28.21250486.full.pdf ; not associated with expected Delta mutations
C	ORF1a	11029	3677	11294	19	4.25056	U	Gap	UUU- ---	F-	Deletion	Positive	9nt deletion at ORF1a amino acid positions 3675-3677 in Alpha, Beta, Gamma VOCs https://www.medrxiv.org/content/medrxiv/early/2021/02/01/2021.01.28.21250486.full.pdf ; not associated with expected Delta mutations
C	ORF1a	11030	3677	11295	19	4.25056	U	Gap	UUU- ---	F-	Deletion	Positive	9nt deletion at ORF1a amino acid positions 3675-3677 in Alpha, Beta, Gamma VOCs https://www.medrxiv.org/content/medrxiv/early/2021/02/01/2021.01.28.21250486.full.pdf ; not associated with expected Delta mutations
C	ORF1a	11031	3677	11296	17	3.80313	U	Gap	UUU- ---	F-	Deletion	Positive	9nt deletion at ORF1a amino acid positions 3675-3677 in Alpha, Beta, Gamma VOCs https://www.medrxiv.org/content/medrxiv/early/2021/02/01/2021.01.28.21250486.full.pdf ; not associated with expected Delta mutations
C	ORF1a	11067	3689	11332	45	10.0671	A	G	GUA-GUG	V-V	Synonymous
C	ORF1a	11153	3718	11418	219	48.9933	U	C	GUU-GCU	V-A	Non-synonymous	Positive	Expected Delta mutation
C	ORF1a	11249	3750	11514	107	23.9374	C	U	ACU-AUU	T-I	Non-synonymous	Positive
C	ORF1a	11559	3853	11824	9	2.01342	C	U	AUC-AUU	I-I	Synonymous
C	ORF1a	12120	4040	12385	7	1.566	G	A	UUG-UUA	L-L	Synonymous
C	ORF1a	12681	4227	12946	119	26.6219	U	C	UAU-UAC	Y-Y	Synonymous		Expected Delta mutation
C	ORF1a	12754	4252	13019	49	10.962	C	U	CUA-UUA	L-L	Synonymous	Negative
C	ORF1b	21	7	13488	6	1.34228	A	G	GCA-GCG	A-A	Synonymous
C	ORF1b	795	265	14262	27	6.04027	C	U	GAC-GAU	D-D	Synonymous
C	ORF1b	941	314	14408	6	1.34228	C	U	CCU-CUU	P-L	Non-synonymous	Positive	Expected Delta mutation
C	ORF1b	1062	354	14529	6	1.34228	C	U	AGC-AGU	S-S	Synonymous
C	ORF1b	1209	403	14676	25	5.59284	C	U	CCC-CCU	P-P	Synonymous
C	ORF1b	1390	464	14857	5	1.11857	G	U	GUU-UUU	V-F	Non-synonymous
C	ORF1b	1407	469	14874	12	2.68456	G	U	AAG-AAU	K-N	Non-synonymous
C	ORF1b	1629	543	15096	7	1.566	U	C	AAU-AAC	N-N	Synonymous
C	ORF1b	1812	604	15279	24	5.36913	C	U	CAC-CAU	H-H	Synonymous
C	ORF1b	1860	620	15327	7	1.566	G	U	AUG-AUU	M-I	Non-synonymous
C	ORF1b	1984	662	15451	172	38.4787	G	A	GGU-AGU	G-S	Non-synonymous		Expected Delta mutation
C	ORF1b	1996	666	15463	7	1.566	G	A	GUU-AUU	V-I	Non-synonymous
C	ORF1b	2709	903	16176	24	5.36913	U	C	ACU-ACC	T-T	Synonymous
C	ORF1b	2999	1000	16466	173	38.7025	C	U	CCA-CUA	P-L	Non-synonymous		Expected Delta mutation
C	ORF1b	3385	1129	16852	61	13.6465	G	U	GGU-UGU	G-C	Non-synonymous
C	ORF1b	3487	1163	16954	8	1.78971	C	U	CUA-UUA	L-L	Synonymous
C	ORF1b	3918	1306	17385	8	1.78971	U	G	GAU-GAG	D-E	Non-synonymous
C	ORF1b	4029	1343	17496	27	6.04027	A	G	GAA-GAG	E-E	Synonymous
C	ORF1b	4056	1352	17523	108	24.1611	G	U	AUG-AUU	M-I	Non-synonymous
C	ORF1b	4709	1570	18176	63	14.094	C	U	CCU-CUU	P-L	Non-synonymous
C	ORF1b	4743	1581	18210	6	1.34228	G	U	AUG-AUU	M-I	Non-synonymous
C	ORF1b	5001	1667	18468	27	6.04027	A	G	GGA-GGG	G-G	Synonymous
C	ORF1b	5277	1759	18744	8	1.78971	C	U	UAC-UAU	Y-Y	Synonymous	Negative
C	ORF1b	5517	1839	18984	7	1.566	G	U	AUG-AUU	M-I	Non-synonymous
C	ORF1b	5634	1878	19101	9	2.01342	G	A	CAG-CAA	Q-Q	Synonymous
C	ORF1b	5753	1918	19220	45	10.0671	C	U	GCU-GUU	A-V	Non-synonymous	Positive
C	ORF1b	6066	2022	19533	6	1.34228	U	C	UAU-UAC	Y-Y	Synonymous
C	ORF1b	6346	2116	19813	16	3.57942	C	U	CCA-UCA	P-S	Non-synonymous	Positive
C	ORF1b	6795	2265	20262	120	26.8456	A	G	UUA-UUG	L-L	Synonymous		Expected Delta mutation
C	ORF1b	6853	2285	20320	55	12.3043	C	U	CAU-UAU	H-Y	Non-synonymous		Expected Delta mutation
C	ORF1b	6929	2310	20396	135	30.2013	A	G	AAG-AGG	K-R	Non-synonymous
C	ORF1b	6934	2312	20401	68	15.2125	U	G	UCA-GCA	S-A	Non-synonymous
C	ORF1b	7212	2404	20679	14	3.13199	G	U	CCG-CCU	P-P	Synonymous	Negative
C	ORF1b	7273	2425	20740	7	1.566	C	A	CAA-AAA	Q-K	Non-synonymous
C	ORF1b	7670	2557	21137	5	1.11857	A	G	AAG-AGG	K-R	Non-synonymous	Positive
C	ORF1b	8083	2695	21550	15	3.3557	A	Gap	AAC- -AC	N-	Deletion		Occurs in the last codon before the stop codon, often followed by n
C	S	8	3	21570	5	1.11857	U	G	GUU-GGU	V-G	Non-synonymous
C	S	56	19	21618	301	67.3378	C	G	ACA-AGA	T-R	Non-synonymous		Expected Delta mutation
C	S	203	68	21765	23	5.14541	U	Gap	AUA-A--	I-	Deletion		4-6nt expected deletion in Alpha and Omicron VOCs at amino acids 69-70, affects IHV codons and joins 2 codons to create I while deleting HV ; not associated with expected Delta mutations
C	S	204	68	21766	23	5.14541	A	Gap	AUA-A--	I-	Deletion		4-6nt expected deletion in Alpha and Omicron VOCs at amino acids 69-70, affects IHV codons and joins 2 codons to create I while deleting HV ; not associated with expected Delta mutations
C	S	205	69	21767	23	5.14541	C	Gap	CAU- ---	H-	Deletion		4-6nt expected deletion in Alpha and Omicron VOCs at amino acids 69-70, affects IHV codons and joins 2 codons to create I while deleting HV ; not associated with expected Delta mutations
C	S	206	69	21768	22	4.9217	A	Gap	CAU- ---	H-	Deletion		4-6nt expected deletion in Alpha and Omicron VOCs at amino acids 69-70, affects IHV codons and joins 2 codons to create I while deleting HV ; not associated with expected Delta mutations
C	S	207	69	21769	22	4.9217	U	Gap	CAU- ---	H-	Deletion		4-6nt expected deletion in Alpha and Omicron VOCs at amino acids 69-70, affects IHV codons and joins 2 codons to create I while deleting HV ; not associated with expected Delta mutations
C	S	208	70	21770	20	4.47427	G	Gap	GUC- -UC	V-	Deletion		4-6nt expected deletion in Alpha and Omicron VOCs at amino acids 69-70, affects IHV codons and joins 2 codons to create I while deleting HV ; not associated with expected Delta mutations
C	S	230	77	21792	26	5.81655	A	C	AAG-ACG	K-T	Non-synonymous
C	S	284	95	21846	91	20.3579	C	U	ACU-AUU	T-I	Non-synonymous	Positive
C	S	333	111	21895	108	24.1611	U	C	GAU-GAC	D-D	Synonymous	Negative
C	S	422	141	21984	5	1.11857	U	Gap	UUG-U--	L-	Deletion		Spike 142/143/144 deletion is expected in Omicron VOC; Alpha VOC expects deletion at only 144 https://www.ncbi.nlm.nih.gov/pmc/articles/PMC8386433/ ; potentially deletes 6 nt across 3 codons to delete LDV and join 2 codons to create F; not associated with expected Delta mutations
C	S	423	141	21985	7	1.566	G	Gap	UUG-U--	L-	Deletion		Spike 142/143/144 deletion is expected in Omicron VOC; Alpha VOC expects deletion at only 144 https://www.ncbi.nlm.nih.gov/pmc/articles/PMC8386433/ ; potentially deletes 6 nt across 3 codons to delete LDV and join 2 codons to create F; not associated with expected Delta mutations
C	S	424	142	21986	6	1.34228	G	Gap	GGU- ---	G-	Deletion	Positive	Spike 142/143/144 deletion is expected in Omicron VOC; Alpha VOC expects deletion at only 144 https://www.ncbi.nlm.nih.gov/pmc/articles/PMC8386433/ ; potentially deletes 6 nt across 3 codons to delete LDV and join 2 codons to create F; not associated with expected Delta mutations
C	S	425	142	21987	6	1.34228	G	Gap	GGU- ---	G-	Deletion	Positive	Spike 142/143/144 deletion is expected in Omicron VOC; Alpha VOC expects deletion at only 144 https://www.ncbi.nlm.nih.gov/pmc/articles/PMC8386433/ ; potentially deletes 6 nt across 3 codons to delete LDV and join 2 codons to create F; not associated with expected Delta mutations
C	S	425	142	21987	150	33.557	G	A	GGU-GAU	G-D	Non-synonymous	Positive	Expected Delta mutation; occurs in different genomes than the surounding deletions
C	S	426	142	21988	5	1.11857	U	Gap	GGU- ---	G-	Deletion	Positive	Spike 142/143/144 deletion is expected in Omicron VOC; Alpha VOC expects deletion at only 144 https://www.ncbi.nlm.nih.gov/pmc/articles/PMC8386433/ ; potentially deletes 6 nt across 3 codons to delete LDV and join 2 codons to create F; not associated with expected Delta mutations
C	S	427	143	21989	6	1.34228	G	Gap	GUU- -UU	V-	Deletion		Spike 142/143/144 deletion is expected in Omicron VOC; Alpha VOC expects deletion at only 144 https://www.ncbi.nlm.nih.gov/pmc/articles/PMC8386433/ ; potentially deletes 6 nt across 3 codons to delete LDV and join 2 codons to create F; not associated with expected Delta mutations
C	S	429	143	21991	23	5.14541	U	Gap	GUU- GU-	V-	Deletion		This deletion occurs in different genomes than the previous ones. 3 consecutive nucleotide deletions at gene positions 429-431 joins 2 codons to delete Y and maintain V; Spike 142/143/144 deletion is expected in Omicron VOC; Alpha VOC expects deletion at only 144 https://www.ncbi.nlm.nih.gov/pmc/articles/PMC8386433/ ; not associated with expected Delta mutations
C	S	430	144	21992	21	4.69799	U	Gap	UAU- --U	Y-	Deletion		This deletion occurs in different genomes than the previous ones. 3 consecutive nucleotide deletions at gene positions 429-431 joins 2 codons to delete Y and maintain V; Spike 142/143/144 deletion is expected in Omicron VOC; Alpha VOC expects deletion at only 144 https://www.ncbi.nlm.nih.gov/pmc/articles/PMC8386433/ ; not associated with expected Delta mutations
C	S	431	144	21993	21	4.69799	A	Gap	UAU- --U	Y-	Deletion		This deletion occurs in different genomes than the previous ones. 3 consecutive nucleotide deletions at gene positions 429-431 joins 2 codons to delete Y and maintain V; Spike 142/143/144 deletion is expected in Omicron VOC; Alpha VOC expects deletion at only 144 https://www.ncbi.nlm.nih.gov/pmc/articles/PMC8386433/ ; not associated with expected Delta mutations
C	S	460	154	22022	63	14.094	G	A	GAA-AAA	E-K	Non-synonymous	Positive
C	S	466	156	22028	76	17.0022	G	Gap	GAG- ---	E-	Deletion		Expected Delta mutation; 6nt expected Delta deletion at amino acids 156/157, some start the gap 1nt earlier than expected to delete GAG,TTC and has an "n" at the start of the 3rd codon. Expected deletion starts at 467 and joins 2 codons to create GGA, deletes EFR and creates G
C	S	467	156	22029	277	61.9687	A	Gap	GAG- G--	E-	Deletion		Expected Delta mutation; 6nt expected Delta deletion at amino acids 156/157, some start the gap 1nt earlier than expected to delete GAG,TTC and has an "n" at the start of the 3rd codon. Expected deletion starts at 467 and joins 2 codons to create GGA, deletes EFR and creates G
C	S	468	156	22030	277	61.9687	G	Gap	GAG- G--	E-	Deletion		Expected Delta mutation; 6nt expected Delta deletion at amino acids 156/157, some start the gap 1nt earlier than expected to delete GAG,TTC and has an "n" at the start of the 3rd codon. Expected deletion starts at 467 and joins 2 codons to create GGA, deletes EFR and creates G
C	S	469	157	22031	282	63.0872	U	Gap	UUC- ---	F-	Deletion		Expected Delta mutation; 6nt expected Delta deletion at amino acids 156/157, some start the gap 1nt earlier than expected to delete GAG,TTC and has an "n" at the start of the 3rd codon. Expected deletion starts at 467 and joins 2 codons to create GGA, deletes EFR and creates G
C	S	470	157	22032	284	63.5347	U	Gap	UUC- ---	F-	Deletion		Expected Delta mutation; 6nt expected Delta deletion at amino acids 156/157, some start the gap 1nt earlier than expected to delete GAG,TTC and has an "n" at the start of the 3rd codon. Expected deletion starts at 467 and joins 2 codons to create GGA, deletes EFR and creates G
C	S	471	157	22033	284	63.5347	C	Gap	UUC- ---	F-	Deletion		Expected Delta mutation; 6nt expected Delta deletion at amino acids 156/157, some start the gap 1nt earlier than expected to delete GAG,TTC and has an "n" at the start of the 3rd codon. Expected deletion starts at 467 and joins 2 codons to create GGA, deletes EFR and creates G
C	S	472	158	22034	188	42.0582	A	Gap	AGA- -GA	R-	Deletion		Expected Delta mutation; 6nt expected Delta deletion at amino acids 156/157, some start the gap 1nt earlier than expected to delete GAG,TTC and has an "n" at the start of the 3rd codon. Expected deletion starts at 467 and joins 2 codons to create GGA, deletes EFR and creates G
C	S	654	218	22216	5	1.11857	G	U	CAG-CAU	Q-H	Non-synonymous
C	S	663	221	22225	6	1.34228	G	A	UCG-UCA	S-S	Synonymous	Negative
C	S	665	222	22227	104	23.2662	C	U	GCU-GUU	A-V	Non-synonymous	Positive
C	S	1155	385	22717	8	1.78971	G	U	GUG-UUG	V-L	Non-synonymous		New positions to match with FUBAR selection sites (-11 for 11nt insertion at Group C S gene nucleotides 756-766); new nt = 1144, new aa = 382
C	S	1366	456	22928	410	91.7226	U	G	CUG-CGG	L-R	Non-synonymous	Positive	Expected Delta mutation; New positions to match with FUBAR selection sites (-11 for 11nt insertion at Group C S gene nucleotides 756-766); new nt = 1355, new aa = 452
C	S	1444	482	23006	297	66.443	C	A	ACA-AAA	T-K	Non-synonymous		Expected Delta mutation; New positions to match with FUBAR selection sites (-11 for 11nt insertion at Group C S gene nucleotides 756-766); new nt = 1433, new aa = 478
C	S	1461	487	23023	113	25.2796	G	C	GAA-CAA	E-Q	Non-synonymous	Positive	New positions to match with FUBAR selection sites (-11 for 11nt insertion at Group C S gene nucleotides 756-766); new nt = 1450, new aa = 484
C	S	1512	504	23074	25	5.59284	A	U	AAU-UAU	N-Y	Non-synonymous	Positive	New positions to match with FUBAR selection sites (-11 for 11nt insertion at Group C S gene nucleotides 756-766); new nt = 1501, new aa = 501
C	S	1720	574	23282	24	5.36913	C	A	GCU-GAU	A-D	Non-synonymous		New positions to match with FUBAR selection sites (-11 for 11nt insertion at Group C S gene nucleotides 756-766); new nt = 1709, new aa = 570
C	S	1852	618	23414	446	99.7763	A	G	GAU-GGU	D-G	Non-synonymous		Expected Delta mutation; New positions to match with FUBAR selection sites (-11 for 11nt insertion at Group C S gene nucleotides 756-766); new nt = 1841, new aa = 614
C	S	2042	681	23604	6	1.34228	G	U	CAG-CAU	Q-H	Non-synonymous		New positions to match with FUBAR selection sites (-11 for 11nt insertion at Group C S gene nucleotides 756-766); new nt = 2031, new aa = 677
C	S	2053	685	23615	24	5.36913	C	A	CCU-CAU	P-H	Non-synonymous	Positive	New positions to match with FUBAR selection sites (-11 for 11nt insertion at Group C S gene nucleotides 756-766); new nt = 2042, new aa = 681
C	S	2053	685	23615	412	92.17	C	G	CCU-CGU	P-R	Non-synonymous	Positive	Expected Delta mutation; New positions to match with FUBAR selection sites (-11 for 11nt insertion at Group C S gene nucleotides 756-766); new nt = 2042, new aa = 681
C	S	2148	716	23710	6	1.34228	G	U	GCC-UCC	A-S	Non-synonymous		New positions to match with FUBAR selection sites (-11 for 11nt insertion at Group C S gene nucleotides 756-766); new nt = 2137, new aa = 713
C	S	2158	720	23720	23	5.14541	C	U	ACA-AUA	T-I	Non-synonymous		New positions to match with FUBAR selection sites (-11 for 11nt insertion at Group C S gene nucleotides 756-766); new nt = 2147, new aa = 716
C	S	2855	952	24417	5	1.11857	U	C	CUU-CUC	L-L	Synonymous		New positions to match with FUBAR selection sites (-11 for 11nt insertion at Group C S gene nucleotides 756-766); new nt = 2844, new aa = 948
C	S	2859	953	24421	159	35.5705	G	A	GAU-AAU	D-N	Non-synonymous	Positive	Expected Delta mutation; New positions to match with FUBAR selection sites (-11 for 11nt insertion at Group C S gene nucleotides 756-766); new nt = 2848, new aa = 950
C	S	2924	975	24486	6	1.34228	U	G	GGU-GGG	G-G	Synonymous		New positions to match with FUBAR selection sites (-11 for 11nt insertion at Group C S gene nucleotides 756-766); new nt = 2913, new aa = 971
C	S	2955	985	24517	24	5.36913	U	G	UCA-GCA	S-A	Non-synonymous		New positions to match with FUBAR selection sites (-11 for 11nt insertion at Group C S gene nucleotides 756-766); new nt = 2944, new aa = 982
C	S	3194	1065	24756	52	11.6331	C	U	GUC-GUU	V-V	Synonymous	Negative	New positions to match with FUBAR selection sites (-11 for 11nt insertion at Group C S gene nucleotides 756-766); new nt = 3183, new aa = 1061
C	S	3224	1075	24786	78	17.4497	A	U	CAA-CAU	Q-H	Non-synonymous		New positions to match with FUBAR selection sites (-11 for 11nt insertion at Group C S gene nucleotides 756-766); new nt = 3213, new aa = 1071
C	S	3312	1104	24874	39	8.72483	C	G	CAC-GAC	H-D	Non-synonymous		New positions to match with FUBAR selection sites (-11 for 11nt insertion at Group C S gene nucleotides 756-766); new nt = 3301, new aa = 1101
C	S	3363	1121	24925	23	5.14541	G	C	GAC-CAC	D-H	Non-synonymous		New positions to match with FUBAR selection sites (-11 for 11nt insertion at Group C S gene nucleotides 756-766); new nt = 3352, new aa = 1118
C	S	3433	1145	24995	5	1.11857	U	G	UUG-UGG	L-W	Non-synonymous		New positions to match with FUBAR selection sites (-11 for 11nt insertion at Group C S gene nucleotides 756-766); new nt = 3422, new aa = 1141
C	S	3468	1156	25030	7	1.566	G	U	GAU-UAU	D-Y	Non-synonymous		New positions to match with FUBAR selection sites (-11 for 11nt insertion at Group C S gene nucleotides 756-766); new nt = 3457, new aa = 1153
C	S	3801	1267	25363	6	1.34228	G	U	GUG-UUG	V-L	Non-synonymous	Positive	New positions to match with FUBAR selection sites (-11 for 11nt insertion at Group C S gene nucleotides 756-766); new nt = 3790, new aa = 1264
C	ORF3a	77	26	25480	409	91.4989	C	U	UCA-UUA	S-L	Non-synonymous	Positive	Expected Delta mutation
C	ORF3a	629	210	26032	6	1.34228	A	G	GAC-GGC	D-G	Non-synonymous
C	ORF3a	670	224	26073	8	1.78971	G	U	GGU-UGU	G-C	Non-synonymous
C	E	184	62	26439	5	1.11857	G	U	GUU-UUU	V-F	Non-synonymous
C	M	159	53	26692	68	15.2125	C	U	UUC-UUU	F-F	Synonymous	Negative
C	M	245	82	26778	61	13.6465	U	G	AUC-AGC	I-S	Non-synonymous	Positive
C	M	245	82	26778	298	66.6667	U	C	AUC-ACC	I-T	Non-synonymous	Positive	Expected Delta mutation
C	ORF6	98	33	27310	47	10.5145	U	C	AUA-ACA	I-T	Non-synonymous
C	ORF7a	245	82	27649	412	92.17	U	C	GUU-GCU	V-A	Non-synonymous		Expected Delta mutation
C	ORF7a	346	116	27750	121	27.0694	C	U	CUC-UUC	L-F	Non-synonymous		Expected Delta mutation
C	ORF7a	357	119	27761	7	1.566	G	U	AAG-AAU	K-N	Non-synonymous
C	ORF7a	359	120	27763	298	66.6667	C	U	ACA-AUA	T-I	Non-synonymous	Positive	Expected Delta mutation
C	ORF7b	119	40	27885	45	10.0671	C	U	ACU-AUU	T-I	Non-synonymous
C	ORF8	79	27	27983	24	5.36913	C	U	CAA-UAA	Q-stop	Non-synonymous		Stop codon, reported in https://www.nature.com/articles/s41598-022-08780-2
C	ORF8	108	36	28012	6	1.34228	G	U	CCG-CCU	P-P	Synonymous
C	ORF8	155	52	28059	24	5.36913	G	U	AGA-AUA	R-I	Non-synonymous
C	ORF8	200	67	28104	6	1.34228	C	U	UCU-UUU	S-F	Non-synonymous
C	ORF8	202	68	28106	9	2.01342	A	U	AAA-UAA	K-stop	Non-synonymous		Stop codon, but all occurences are in the same genomes that already had a premature stop codon at aa27. still recording as a mutation because it is within the ORF8 reading frame but biologically it does not matter (gene does not re-start with new M after the aa27 stop)
C	ORF8	206	69	28110	17	3.80313	C	U	UCA-UUA	S-L	Non-synonymous
C	ORF8	218	73	28122	24	5.36913	A	G	UAC-UGC	Y-C	Non-synonymous
C	ORF8	354	118	28258	7	1.566	A	Gap	UUA-UU-	L-	Deletion		Expected 6nt Delta deletion at ORF8 aa119-120, but some genomes have the deletion shifted earlier, possibly an alignment error because its around a region of a lot of consecutive T's, but can't assume that it isnt a true shift. Deletion shifted back would delete LD and join 2 codons to maintain V at aa118
C	ORF8	355	119	28259	250	55.9284	G	Gap	GAU- ---	D-	Deletion		Expected 6nt Delta deletion at ORF8 aa119-120
C	ORF8	356	119	28260	248	55.481	A	Gap	GAU- ---	D-	Deletion		Expected 6nt Delta deletion at ORF8 aa119-120
C	ORF8	357	119	28261	245	54.8098	U	Gap	GAU- ---	D-	Deletion		Expected 6nt Delta deletion at ORF8 aa119-120
C	ORF8	358	120	28262	245	54.8098	U	Gap	UUC- ---	F-	Deletion		Expected 6nt Delta deletion at ORF8 aa119-120
C	ORF8	359	120	28263	245	54.8098	U	Gap	UUC- ---	F-	Deletion		Expected 6nt Delta deletion at ORF8 aa119-120
C	ORF8	360	120	28264	156	34.8993	C	Gap	UUC- ---	F-	Deletion		Expected 6nt Delta deletion at ORF8 aa119-120
C	ORF8	360	120	28264	9	2.01342	C	A	UUC-UUA	F-L	Non-synonymous
C	ORF8	360	120	28264	30	6.71141	C	U	UUC-UUU	F-F	Synonymous
C	N	7	3	28291	16	3.57942	G	U	GAU-UAU	D-Y	Non-synonymous	Positive	Occurs in different genomes than the 3nt substitutions at N nucelotides 7-9
C	N	7	3	28291	21	4.69799	G	C	GAU-CUA	D-L	Non-synonymous	Positive	28291/28292/28293 always seen as substitutions from GAU to CUA together
C	N	8	3	28292	21	4.69799	A	U	GAU-CUA	D-L	Non-synonymous	Positive	28291/28292/28293 always seen as substitutions from GAU to CUA together
C	N	9	3	28293	21	4.69799	U	A	GAU-CUA	D-L	Non-synonymous	Positive	28291/28292/28293 always seen as substitutions from GAU to CUA together
C	N	103	35	28387	5	1.11857	G	U	GCG-UCG	A-S	Non-synonymous	Positive
C	N	136	46	28420	6	1.34228	C	U	CCC-UCC	P-S	Non-synonymous
C	N	188	63	28472	267	59.7315	A	G	GAC-GGC	D-G	Non-synonymous	Positive	Expected Delta mutation
C	N	519	173	28803	6	1.34228	A	G	GCA-GCG	A-A	Synonymous
C	N	608	203	28892	412	92.17	G	U	AGG-AUG	R-M	Non-synonymous		Expected Delta mutation; occurs in different genomes than the 3nt substitutions at N nucleotides 608-610
C	N	608	203	28892	26	5.81655	G	A	AGG-AAA	R-K	Non-synonymous		28892/28893/28894 always seen together as substitutions from AGG-AAA and GGA-CGA together
C	N	609	203	28893	26	5.81655	G	A	AGG-AAA	R-K	Non-synonymous		28892/28893/28894 always seen together as substitutions from AGG-AAA and GGA-CGA together
C	N	610	204	28894	26	5.81655	G	C	GGA-CGA	G-R	Non-synonymous		28892/28893/28894 always seen together as substitutions from AGG-AAA and GGA-CGA together
C	N	622	208	28906	6	1.34228	G	U	GCU-UCU	A-S	Non-synonymous
C	N	643	215	28927	44	9.8434	G	U	GGU-UGU	G-C	Non-synonymous
C	N	704	235	28988	23	5.14541	C	U	UCU-UUU	S-F	Non-synonymous	Positive
C	N	981	327	29265	6	1.34228	G	U	UCG-UCU	S-S	Synonymous
C	N	1085	362	29369	21	4.69799	C	U	ACA-AUA	T-I	Non-synonymous
C	N	1129	377	29413	410	91.7226	G	U	GAU-UAU	D-Y	Non-synonymous		Expected Delta mutation
C	N	1154	385	29438	56	12.528	G	A	AGA-AAA	R-K	Non-synonymous		Expected Delta mutation
