# Supplementary material for: Tracking the evolution of the SARS-CoV-2 Delta variant of concern: analysis of genetic diversity and selection across the whole viral genome
Source: Front Microbiol. 2023 Aug 8;14:1222301. doi: 10.3389/fmicb.2023.1222301 (PMC10443222; doi:10.3389/fmicb.2023.1222301)
Supplement: Supplementary file 9 [file Data_Sheet_8.XLSX]

## Sheet: Sheet1
Group	Genome region	Gene position (nucleotide)	Gene position (amino acid)	Full genome position (nucleotide)	Mutation occurance count	Percentage of group affected (occurance / respective group total)	Original nucleotide (in reference genome)	Mutated nucleotide	Codon change	Amino acid change	Mutation type	FUBAR positive or negative selection	Mutation Notes	Matches with other groups?	Group A nt position equivalent	Group A aa position equivalent	Position Notes
A	ORF1a	341	114	634	6	1.03627	U	C	AUA-ACA	I-T	Non-synonymous			No
A	ORF1a	619	207	912	6	1.03627	C	U	CGU-UGU	R-C	Non-synonymous			No
A	ORF1a	1016	339	1309	21	3.62694	C	U	GCC-GUC	A-V	Non-synonymous			No
A	ORF1a	1132	378	1425	6	1.03627	G	A	GUA-AUA	V-I	Non-synonymous			No
A	ORF1a	1555	519	1848	15	2.59067	G	A	GGU-AGU	G-S	Non-synonymous	Positive		No
A	ORF1a	1878	626	2171	11	1.89983	C	U	CCC-CCU	P-P	Synonymous	Negative		No
A	ORF1a	3477	1159	3770	7	1.20898	A	G	AUA-AUG	I-M	Non-synonymous			No
A	ORF1a	4601	1534	4894	6	1.03627	G	U	AGU-AUU	S-I	Non-synonymous			No
A	ORF1a	4790	1597	5083	7	1.20898	C	U	ACU-AUU	T-I	Non-synonymous			No
A	ORF1a	6047	2016	6340	102	17.6166	C	A	ACA-AAA	T-K	Non-synonymous			No
A	ORF1a	7680	2560	7973	7	1.20898	C	U	UAC-UAU	Y-Y	Synonymous	Negative		No
A	ORF1a	8388	2796	8681	6	1.03627	G	U	AUG-AUU	M-I	Non-synonymous			No
A	ORF1a	8517	2839	8810	27	4.66321	C	U	AGC-AGU	S-S	Synonymous	Negative		No
A	ORF1a	9173	3058	9466	7	1.20898	C	U	ACA-AUA	T-I	Non-synonymous			No
A	ORF1a	9873	3291	10166	6	1.03627	C	U	AAC-AAU	N-N	Synonymous			No
A	ORF1a	10437	3479	10730	6	1.03627	C	U	GAC-GAU	D-D	Synonymous			No
A	ORF1a	10938	3646	11231	10	1.72712	C	U	GCC-GCU	A-A	Synonymous			No
A	ORF1a	11905	3969	12198	6	1.03627	G	A	GUU-AUU	V-I	Non-synonymous			No
A	ORF1a	12177	4059	12470	12	2.07254	C	U	CCC-CCU	P-P	Synonymous	Negative		No
A	ORF1a	12354	4118	12647	8	1.38169	C	U	GAC-GAU	D-D	Synonymous			No
B	ORF1a	111	37	376	14	2.52708	G	A	GAG-GAA	E-E	Synonymous			No	111	37
B	ORF1a	222	74	487	11	1.98556	G	U	UCG-UCU	S-S	Synonymous	Negative		No	222	74
B	ORF1a	829	277	1094	22	3.97112	U	C	UUA-CUA	L-L	Synonymous			No	829	277
B	ORF1a	953	318	1218	7	1.26354	C	U	UCA-UUA	S-L	Non-synonymous			No	953	318
B	ORF1a	1176	392	1441	10	1.80505	C	U	GGC-GGU	G-G	Synonymous			No	1176	392
B	ORF1a	2060	687	2325	23	4.15163	C	U	GCU-GUU	A-V	Non-synonymous			No	2060	687
B	ORF1a	3146	1049	3411	10	1.80505	C	U	GCU-GUU	A-V	Non-synonymous			No	3146	1049
B	ORF1a	3509	1170	3774	12	2.16607	G	A	CGC-CAC	R-H	Non-synonymous			No	3509	1170
B	ORF1a	3606	1202	3871	6	1.08303	G	U	AAG-AAU	K-N	Non-synonymous			No	3606	1202
B	ORF1a	3756	1252	4021	7	1.26354	C	U	AAC-AAU	N-N	Synonymous			No	3756	1252
B	ORF1a	4278	1426	4543	6	1.08303	C	U	ACC-ACU	T-T	Synonymous	Negative		No	4278	1426
B	ORF1a	5407	1803	5672	10	1.80505	C	U	CCU-UCU	P-S	Non-synonymous			No	5407	1803
B	ORF1a	5619	1873	5884	11	1.98556	C	U	UAC-UAU	Y-Y	Synonymous			No	5619	1873
B	ORF1a	5761	1921	6026	9	1.62455	C	U	CCA-UCA	P-S	Non-synonymous	Positive		No	5761	1921
B	ORF1a	6273	2091	6538	7	1.26354	C	U	GGC-GGU	G-G	Synonymous			No	6273	2091
B	ORF1a	6428	2143	6693	7	1.26354	A	G	AAG-AGG	K-R	Non-synonymous			No	6428	2143
B	ORF1a	7492	2498	7757	10	1.80505	A	C	AAU-CAU	N-H	Non-synonymous	Positive		No	7492	2498
B	ORF1a	7579	2527	7844	7	1.26354	C	U	CUG-UUG	L-L	Synonymous	Negative		No	7579	2527
B	ORF1a	7809	2603	8074	22	3.97112	C	U	AAC-AAU	N-N	Synonymous			No	7809	2603
B	ORF1a	8106	2702	8371	6	1.08303	G	U	CAG-CAU	Q-H	Non-synonymous			No	8106	2702
B	ORF1a	9786	3262	10051	16	2.88809	G	A	UUG-UUA	L-L	Synonymous			No	9786	3262
B	ORF1a	10058	3353	10323	10	1.80505	A	G	AAG-AGG	K-R	Non-synonymous	Positive		No	10058	3353
B	ORF1a	10221	3407	10486	9	1.62455	A	G	UCA-UCG	S-S	Synonymous	Negative		No	10221	3407
B	ORF1a	10765	3589	11030	10	1.80505	A	G	ACU-GCU	T-A	Non-synonymous			No	10765	3589
B	ORF1a	11190	3730	11455	6	1.08303	C	U	GCC-GCU	A-A	Synonymous	Negative		No	11193	3731
B	ORF1a	12281	4094	12546	40	7.22022	C	U	GCA-GUA	A-V	Non-synonymous	Negative	Same codon but mutations always occur in different genomes	No	12284	4095
B	ORF1a	12282	4094	12547	22	3.97112	A	U	GCA-GCU	A-A	Synonymous	Negative	Same codon but mutations always occur in different genomes	No	12285	4095
C	ORF1a	160	54	425	7	1.566	G	A	GUA-AUA	V-I	Non-synonymous			No	160	54
C	ORF1a	264	88	529	8	1.78971	G	U	CUG-CUU	L-L	Synonymous			No	264	88
C	ORF1a	421	141	686	5	1.11857	A	gap	AAG- ---	K-	Deletion		9nt deletion at gene position 686-694, documented in literature at https://translational-medicine.biomedcentral.com/articles/10.1186/s12967-020-02507-5 9 (reports full genome aa241-243 KSF)	No	421	141
C	ORF1a	422	141	687	5	1.11857	A	gap	AAG- ---	K-	Deletion		9nt deletion at gene position 686-694, documented in literature at https://translational-medicine.biomedcentral.com/articles/10.1186/s12967-020-02507-5 9 (reports full genome aa241-243 KSF)	No	422	141
C	ORF1a	423	141	688	5	1.11857	G	gap	AAG- ---	K-	Deletion		9nt deletion at gene position 686-694, documented in literature at https://translational-medicine.biomedcentral.com/articles/10.1186/s12967-020-02507-5 9 (reports full genome aa241-243 KSF)	No	423	141
C	ORF1a	424	142	689	5	1.11857	U	gap	UCA- ---	S-	Deletion		9nt deletion at gene position 686-694, documented in literature at https://translational-medicine.biomedcentral.com/articles/10.1186/s12967-020-02507-5 9 (reports full genome aa241-243 KSF)	No	424	142
C	ORF1a	425	142	690	5	1.11857	C	gap	UCA- ---	S-	Deletion		9nt deletion at gene position 686-694, documented in literature at https://translational-medicine.biomedcentral.com/articles/10.1186/s12967-020-02507-5 9 (reports full genome aa241-243 KSF)	No	425	142
C	ORF1a	426	142	691	5	1.11857	A	gap	UCA- ---	S-	Deletion		9nt deletion at gene position 686-694, documented in literature at https://translational-medicine.biomedcentral.com/articles/10.1186/s12967-020-02507-5 9 (reports full genome aa241-243 KSF)	No	426	142
C	ORF1a	427	143	692	5	1.11857	U	gap	UUU- ---	F-	Deletion		9nt deletion at gene position 686-694, documented in literature at https://translational-medicine.biomedcentral.com/articles/10.1186/s12967-020-02507-5 9 (reports full genome aa241-243 KSF)	No	427	143
C	ORF1a	428	143	693	5	1.11857	U	gap	UUU- ---	F-	Deletion		9nt deletion at gene position 686-694, documented in literature at https://translational-medicine.biomedcentral.com/articles/10.1186/s12967-020-02507-5 9 (reports full genome aa241-243 KSF)	No	428	143
C	ORF1a	429	143	694	5	1.11857	U	gap	UUU- ---	F-	Deletion		9nt deletion at gene position 686-694, documented in literature at https://translational-medicine.biomedcentral.com/articles/10.1186/s12967-020-02507-5 9 (reports full genome aa241-243 KSF)	No	429	143
C	ORF1a	564	188	829	6	1.34228	C	U	AAC-AAU	N-N	Synonymous			No	564	188
C	ORF1a	570	190	835	14	3.13199	C	U	UUC-UUU	F-F	Synonymous	Negative		No	570	190
C	ORF1a	648	216	913	24	5.36913	C	U	UCC-UCU	S-S	Synonymous			No	648	216
C	ORF1a	926	309	1191	147	32.8859	C	U	CCA-CUA	P-L	Non-synonymous	Positive	Expected Delta mutation	No	926	309
C	ORF1a	1002	334	1267	147	32.8859	C	U	GGC-GGU	G-G	Synonymous		Expected Delta mutation	No	1002	334
C	ORF1a	1647	549	1912	6	1.34228	C	U	UCC-UCU	S-S	Synonymous			No	1647	549
C	ORF1a	1772	591	2037	6	1.34228	C	U	GCU-GUU	A-V	Non-synonymous			No	1772	591
C	ORF1a	2188	730	2453	10	2.23714	C	U	CUC-UUC	L-F	Non-synonymous			No	2188	730
C	ORF1a	2244	748	2509	16	3.57942	C	U	CCC-CCU	P-P	Synonymous	Negative		No	2244	748
C	ORF1a	2976	992	3241	7	1.566	C	U	GAC-GAU	D-D	Synonymous			No	2976	992
C	ORF1a	3192	1064	3457	109	24.3848	C	U	UAC-UAU	Y-Y	Synonymous			No	3192	1064
C	ORF1a	3609	1203	3874	11	2.46085	C	U	AUC-AUU	I-I	Synonymous	Negative		No	3609	1203
C	ORF1a	3897	1299	4162	7	1.566	G	U	GUG-GUU	V-V	Synonymous	Negative		No	3897	1299
C	ORF1a	3916	1306	4181	45	10.0671	G	U	GCU-UCU	A-S	Non-synonymous			No	3916	1306
C	ORF1a	4700	1567	4965	107	23.9374	C	U	ACU-AUU	T-I	Non-synonymous			No	4700	1567
C	ORF1a	4919	1640	5184	189	42.2819	U	C	CCU-CUU	P-L	Non-synonymous		Expected Delta mutation	No	4919	1640
C	ORF1a	5123	1708	5388	24	5.36913	C	A	GCU-GAU	A-D	Non-synonymous			No	5123	1708
C	ORF1a	5268	1756	5533	5	1.11857	A	G	GGA-GGG	G-G	Synonymous			No	5268	1756
C	ORF1a	5274	1758	5539	6	1.34228	G	A	CAG-CAA	Q-Q	Synonymous			No	5274	1758
C	ORF1a	5319	1773	5584	50	11.1857	A	G	ACA-ACG	T-T	Synonymous	Negative		No	5319	1773
C	ORF1a	5721	1907	5986	26	5.81656	C	U	UUC-UUU	F-F	Synonymous	Negative		No	5721	1907
C	ORF1a	6137	2046	6402	46	10.2908	C	U	CCA-CUA	P-L	Non-synonymous	Positive		No	6137	2046
C	ORF1a	6184	2062	6449	9	2.01342	C	U	CUU-UUU	L-F	Non-synonymous			No	6184	2062
C	ORF1a	6274	2092	6539	35	7.82998	C	U	CAC-UAC	H-Y	Non-synonymous	Positive	Expected Delta mutation	No	6274	2092
C	ORF1a	6486	2162	6751	9	2.01342	C	U	AAC-AAU	N-N	Synonymous	Negative		No	6486	2162
C	ORF1a	6689	2230	6954	24	5.36913	U	C	AUA-ACA	I-T	Non-synonymous			No	6689	2230
C	ORF1a	6859	2287	7124	45	10.0671	C	U	CCU-UCU	P-S	Non-synonymous			No	6859	2287
C	ORF1a	6900	2300	7165	34	7.60626	C	U	ACC-ACU	T-T	Synonymous			No	6900	2300
C	ORF1a	7066	2356	7331	9	2.01342	G	A	GUA-AUA	V-I	Non-synonymous			No	7066	2356
C	ORF1a	8226	2742	8491	6	1.34228	G	A	UUG-UUA	L-L	Synonymous			No	8226	2742
C	ORF1a	8721	2907	8986	45	10.0671	C	U	GAC-GAU	D-D	Synonymous			No	8721	2907
C	ORF1a	8788	2930	9053	45	10.0671	G	U	GUA-UUA	V-L	Non-synonymous			No	8788	2930
C	ORF1a	8938	2980	9203	27	6.04027	G	A	GAU-AAU	D-N	Non-synonymous			No	8938	2980
C	ORF1a	9294	3098	9559	5	1.11857	C	U	UAC-UAU	Y-Y	Synonymous	Negative		No	9294	3098
C	ORF1a	9413	3138	9678	27	6.04027	U	C	UUC-UCC	F-S	Non-synonymous			No	9413	3138
C	ORF1a	9626	3209	9891	219	48.9933	U	C	GCU-GUU	A-V	Non-synonymous		Expected Delta mutation	No	9626	3209
C	ORF1a	10185	3395	10450	5	1.11857	C	U	CCC-CCU	P-P	Synonymous			No	10185	3395
C	ORF1a	10740	3580	11005	13	2.90828	C	A	CAC-CAA	H-Q	Non-synonymous	Positive		No	10740	3580
C	ORF1a	10936	3646	11201	152	34.0045	A	G	ACU-GCU	T-A	Non-synonymous			No	10939	3647	Here onward, +3 for 3nt insertion at group A positions 10810-10812 (full genome = 11103-11105)
C	ORF1a	11023	3675	11288	21	4.69799	U	gap	UCU- ---	S-	Deletion		9nt deletion at aa3675-3677 is reported in Alpha, Beta, Gamma VOCs in literature https://www.medrxiv.org/content/medrxiv/early/2021/02/01/2021.01.28.21250486.full.pdf	No	11026	3676
C	ORF1a	11024	3675	11289	21	4.69799	C	gap	UCU- ---	S-	Deletion		9nt deletion at aa3675-3677 is reported in Alpha, Beta, Gamma VOCs in literature https://www.medrxiv.org/content/medrxiv/early/2021/02/01/2021.01.28.21250486.full.pdf	No	11027	3676
C	ORF1a	11025	3675	11290	21	4.69799	U	gap	UCU- ---	S-	Deletion		9nt deletion at aa3675-3677 is reported in Alpha, Beta, Gamma VOCs in literature https://www.medrxiv.org/content/medrxiv/early/2021/02/01/2021.01.28.21250486.full.pdf	No	11028	3676
C	ORF1a	11026	3676	11291	19	4.25056	G	gap	GGU- ---	G-	Deletion		9nt deletion at aa3675-3677 is reported in Alpha, Beta, Gamma VOCs in literature https://www.medrxiv.org/content/medrxiv/early/2021/02/01/2021.01.28.21250486.full.pdf	No	11029	3677
C	ORF1a	11027	3676	11292	19	4.25056	G	gap	GGU- ---	G-	Deletion		9nt deletion at aa3675-3677 is reported in Alpha, Beta, Gamma VOCs in literature https://www.medrxiv.org/content/medrxiv/early/2021/02/01/2021.01.28.21250486.full.pdf	No	11030	3677
C	ORF1a	11028	3676	11293	19	4.25056	U	gap	GGU- ---	G-	Deletion		9nt deletion at aa3675-3677 is reported in Alpha, Beta, Gamma VOCs in literature https://www.medrxiv.org/content/medrxiv/early/2021/02/01/2021.01.28.21250486.full.pdf	No	11031	3677
C	ORF1a	11029	3677	11294	19	4.25056	U	gap	UUU- ---	F-	Deletion	Positive	9nt deletion at aa3675-3677 is reported in Alpha, Beta, Gamma VOCs in literature https://www.medrxiv.org/content/medrxiv/early/2021/02/01/2021.01.28.21250486.full.pdf	No	11032	3678
C	ORF1a	11030	3677	11295	19	4.25056	U	gap	UUU- ---	F-	Deletion	Positive	9nt deletion at aa3675-3677 is reported in Alpha, Beta, Gamma VOCs in literature https://www.medrxiv.org/content/medrxiv/early/2021/02/01/2021.01.28.21250486.full.pdf	No	11033	3678
C	ORF1a	11031	3677	11296	17	3.80313	U	gap	UUU- ---	F-	Deletion	Positive	9nt deletion at aa3675-3677 is reported in Alpha, Beta, Gamma VOCs in literature https://www.medrxiv.org/content/medrxiv/early/2021/02/01/2021.01.28.21250486.full.pdf	No	11034	3678
C	ORF1a	11067	3689	11332	45	10.0671	A	G	GUA-GUG	V-V	Synonymous			No	11070	3690
C	ORF1a	11249	3750	11514	107	23.9374	C	U	ACU-AUU	T-I	Non-synonymous	Positive		No	11252	3751
C	ORF1a	11559	3853	11824	9	2.01342	C	U	AUC-AUU	I-I	Synonymous			No	11562	3854
C	ORF1a	12120	4040	12385	7	1.566	G	A	UUG-UUA	L-L	Synonymous			No	12123	4041
C	ORF1a	12681	4227	12946	119	26.6219	U	C	UAU-UAC	Y-Y	Synonymous		Expected Delta mutation	No	12684	4228
C	ORF1a	12754	4252	13019	49	10.962	C	U	CUA-UUA	L-L	Synonymous	Negative		No	12757	4253
A	ORF1b	118	40	13616	6	1.03627	C	U	CUA-UUA	L-L	Synonymous			No
A	ORF1b	263	88	13761	114	19.6891	C	U	GCU-GUU	A-V	Non-synonymous	Positive		No
A	ORF1b	958	320	14456	6	1.03627	C	A	CUA-AUA	L-I	Non-synonymous			No
A	ORF1b	1206	402	14704	6	1.03627	A	G	AAA-AAG	K-K	Synonymous			No
A	ORF1b	2550	850	16048	10	1.72712	C	U	UUC-UUU	F-F	Synonymous			No
A	ORF1b	2611	871	16109	12	2.07254	G	A	GUC-AUC	V-I	Non-synonymous			No
A	ORF1b	3478	1160	16976	7	1.20898	G	A	GCA-ACA	A-T	Non-synonymous			No
A	ORF1b	5606	1869	19104	6	1.03627	A	G	GAU-GGU	D-G	Non-synonymous			No
A	ORF1b	5619	1873	19117	6	1.03627	G	U	AAG-AAU	K-N	Non-synonymous			No
A	ORF1b	6057	2019	19555	20	3.45423	C	U	CUC-CUU	L-L	Synonymous	Negative		No
A	ORF1b	7242	2414	20740	6	1.03627	G	U	AUG-AUU	M-I	Non-synonymous	Positive		No
B	ORF1b	414	138	13881	6	1.08303	C	U	GUC-GUU	V-V	Synonymous			No
B	ORF1b	1033	345	14500	6	1.08303	G	U	GUA-UUA	V-L	Non-synonymous			No
B	ORF1b	2439	813	15906	15	2.70758	G	U	CAG-CAU	Q-H	Non-synonymous	Positive		No
B	ORF1b	2686	896	16153	7	1.26354	G	A	GUU-AUU	V-I	Non-synonymous			No
B	ORF1b	3259	1087	16726	6	1.08303	C	U	CAU-UAU	H-Y	Non-synonymous	Positive		No
B	ORF1b	3420	1140	16887	9	1.62455	C	U	UAC-UAU	Y-Y	Synonymous	Negative		No
B	ORF1b	4007	1336	17474	6	1.08303	C	U	ACU-AUU	T-I	Non-synonymous			No
B	ORF1b	4662	1554	18129	22	3.97112	C	U	GAC-GAU	D-D	Synonymous			No
B	ORF1b	5461	1821	18928	12	2.16607	C	U	CCU-UCU	P-S	Non-synonymous			No
B	ORF1b	6395	2132	19862	16	2.88809	C	U	GCU-GUU	A-V	Non-synonymous			No
B	ORF1b	6480	2160	19947	19	3.4296	G	U	AAG-AAU	K-N	Non-synonymous			No
B	ORF1b	6495	2165	19962	14	2.52708	G	U	ACG-ACU	T-T	Synonymous	Negative		No
B	ORF1b	6917	2306	20384	6	1.08303	C	U	GCU-GUU	A-V	Non-synonymous			No
B	ORF1b	7180	2394	20647	10	1.80505	C	A	CCA-ACA	P-T	Non-synonymous			No
B	ORF1b	7567	2523	21034	51	9.20578	C	U	CUC-UUC	L-F	Non-synonymous	Positive		No
C	ORF1b	795	265	14262	27	6.04027	C	U	GAC-GAU	D-D	Synonymous			No
C	ORF1b	1062	354	14529	6	1.34228	C	U	AGC-AGU	S-S	Synonymous			No
C	ORF1b	1209	403	14676	25	5.59284	C	U	CCC-CCU	P-P	Synonymous			No
C	ORF1b	1390	464	14857	5	1.11857	G	U	GUU-UUU	V-F	Non-synonymous			No
C	ORF1b	1407	469	14874	12	2.68456	G	U	AAG-AAU	K-N	Non-synonymous			No
C	ORF1b	1629	543	15096	7	1.566	U	C	AAU-AAC	N-N	Synonymous			No
C	ORF1b	1812	604	15279	24	5.36913	C	U	CAC-CAU	H-H	Synonymous			No
C	ORF1b	1860	620	15327	7	1.566	G	U	AUG-AUU	M-I	Non-synonymous			No
C	ORF1b	1996	666	15463	7	1.566	G	A	GUU-AUU	V-I	Non-synonymous			No
C	ORF1b	2709	903	16176	24	5.36913	U	C	ACU-ACC	T-T	Synonymous			No
C	ORF1b	2999	1000	16466	173	38.7025	C	U	CCA-CUA	P-L	Non-synonymous		Expected Delta mutation	No
C	ORF1b	3385	1129	16852	61	13.6465	G	U	GGU-UGU	G-C	Non-synonymous			No
C	ORF1b	3487	1163	16954	8	1.78971	C	U	CUA-UUA	L-L	Synonymous			No
C	ORF1b	3918	1306	17385	8	1.78971	U	G	GAU-GAG	D-E	Non-synonymous			No
C	ORF1b	4029	1343	17496	27	6.04027	A	G	GAA-GAG	E-E	Synonymous			No
C	ORF1b	4056	1352	17523	108	24.1611	G	U	AUG-AUU	M-I	Non-synonymous			No
C	ORF1b	4709	1570	18176	63	14.094	C	U	CCU-CUU	P-L	Non-synonymous			No
C	ORF1b	4743	1581	18210	6	1.34228	G	U	AUG-AUU	M-I	Non-synonymous			No
C	ORF1b	5001	1667	18468	27	6.04027	A	G	GGA-GGG	G-G	Synonymous			No
C	ORF1b	5277	1759	18744	8	1.78971	C	U	UAC-UAU	Y-Y	Synonymous	Negative		No
C	ORF1b	5517	1839	18984	7	1.566	G	U	AUG-AUU	M-I	Non-synonymous			No
C	ORF1b	5634	1878	19101	9	2.01342	G	A	CAG-CAA	Q-Q	Synonymous			No
C	ORF1b	5753	1918	19220	45	10.0671	C	U	GCU-GUU	A-V	Non-synonymous	Positive		No
C	ORF1b	6066	2022	19533	6	1.34228	U	C	UAU-UAC	Y-Y	Synonymous			No
C	ORF1b	6346	2116	19813	16	3.57942	C	U	CCA-UCA	P-S	Non-synonymous	Positive		No
C	ORF1b	6795	2265	20262	120	26.8456	A	G	UUA-UUG	L-L	Synonymous		Expected Delta mutation	No
C	ORF1b	6853	2285	20320	55	12.3042	C	U	CAU-UAU	H-Y	Non-synonymous		Expected Delta mutation	No
C	ORF1b	6929	2310	20396	135	30.2013	A	G	AAG-AGG	K-R	Non-synonymous			No
C	ORF1b	6934	2312	20401	68	15.2125	U	G	UCA-GCA	S-A	Non-synonymous			No
C	ORF1b	7212	2404	20679	14	3.13199	G	U	CCG-CCU	P-P	Synonymous	Negative		No
C	ORF1b	7273	2425	20740	7	1.566	C	A	CAA-AAA	Q-K	Non-synonymous			No
C	ORF1b	7670	2557	21137	5	1.11857	A	G	AAG-AGG	K-R	Non-synonymous	Positive		No
A	S	13	5	21606	6	1.03627	C	U	CUU-UUU	L-F	Non-synonymous			No
A	S	162	54	21755	6	1.03627	G	U	UUG-UUU	L-F	Non-synonymous			No
A	S	233	78	21826	9	1.5544	G	U	AGG-AUG	R-M	Non-synonymous			No
A	S	781	261	22374	8	1.38169	G	A	GGU-AGU	G-S	Non-synonymous			No
A	S	906	302	22499	30	5.18135	G	U	ACG-ACU	T-T	Synonymous	Negative		No
A	S	1558	520	23151	8	1.38169	G	U	GCA-UCA	A-S	Non-synonymous			No
A	S	1749	583	23342	8	1.38169	G	U	GAG-GAU	E-D	Non-synonymous	Positive		No
A	S	2073	691	23666	6	1.03627	C	U	UCC-UCU	S-S	Synonymous	Negative		No
A	S	2388	796	23981	94	16.2349	C	U	UAC-UAU	Y-Y	Synonymous	Negative		No
A	S	3469	1157	25062	6	1.03627	C	U	UUC-UUU	F-F	Synonymous			No	3465	1155	Here onward, frameshift adjusted positions to match with FUBAR selection sites (where frameshifts are removed)
A	S	3777	1259	25370	10	1.72712	G	U	GGA-GUA	G-V	Non-synonymous			No	3773	1258
A	S	3844	1282	25437	6	1.03627	A	C	ACA-ACC	T-T	Synonymous	Negative		No	3840	1280
B	S	52	18	21614	8	1.44404	U	C	CUU-UUU	L-F	Non-synonymous			No	52	18
B	S	412	138	21974	6	1.08303	G	U	GAU-UAU	D-Y	Non-synonymous	Positive		No	412	138
B	S	1686	562	23248	6	1.08303	C	U	UUC-UUU	F-F	Synonymous			No	1686	562
B	S	2025	675	23587	8	1.44404	G	U	CAG-CAU	Q-H	Non-synonymous	Positive		No	2025	675
B	S	2311	771	23873	14	2.52708	G	U	GCU-UCU	A-S	Non-synonymous			No	2332	778	Here onward, +21 for 21nt insertion at group A positions 2183-2203 (full genome = 23776-23796)
B	S	2826	942	24388	6	1.08303	A	gap	GCA-GC-	A-	Deletion		Causes frameshift in these genomes leading to premature truncation of the gene	No	2851	951	Here onward, +4 for 4nt insertion at group A positions 2675-2678 (full genome = 24268-24271); +21 for 21nt insertion at group A positions 2183-2203 (full genome = 23776-23796)
B	S	3342	1114	24904	6	1.08303	C	U	AUC-AUU	I-I	Synonymous			No	3367	1123
C	S	8	3	21570	5	1.11857	U	G	GUU-GGU	V-G	Non-synonymous			No	8	3
C	S	56	19	21618	301	67.3378	C	G	ACA-AGA	T-R	Non-synonymous		Expected Delta mutation	No	56	19
C	S	203	68	21765	23	5.14541	U	gap	AUA-A--	I-	Deletion		4-6nt expected Alpha deletion at aa69-70, affects IHV amino acids and joins 2 codons to create I while deleting HV	No	203	68
C	S	204	68	21766	23	5.14541	A	gap	AUA-A--	I-	Deletion		4-6nt expected Alpha deletion at aa69-70, affects IHV amino acids and joins 2 codons to create I while deleting HV	No	204	68
C	S	205	69	21767	23	5.14541	C	gap	CAU- ---	H-	Deletion		4-6nt expected Alpha deletion at aa69-70, affects IHV amino acids and joins 2 codons to create I while deleting HV	No	205	69
C	S	206	69	21768	22	4.9217	A	gap	CAU- ---	H-	Deletion		4-6nt expected Alpha deletion at aa69-70, affects IHV amino acids and joins 2 codons to create I while deleting HV	No	206	69
C	S	207	69	21769	22	4.9217	U	gap	CAU- ---	H-	Deletion		4-6nt expected Alpha deletion at aa69-70, affects IHV amino acids and joins 2 codons to create I while deleting HV	No	207	69
C	S	208	70	21770	20	4.47427	G	gap	GUC--UC	V-	Deletion		4-6nt expected Alpha deletion at aa69-70, affects IHV amino acids and joins 2 codons to create I while deleting HV	No	208	70
C	S	284	95	21846	91	20.3579	C	U	ACU-AUU	T-I	Non-synonymous	Positive		No	284	95
C	S	333	111	21895	108	24.1611	U	C	GAU-GAC	D-D	Synonymous	Negative		No	333	111
C	S	422	141	21984	5	1.11857	U	gap	UUG-U--	L-	Deletion		Spike aa 142/143/144 deletion reported in Omicron; only aa 144 reported in Alpha https://www.ncbi.nlm.nih.gov/pmc/articles/PMC8386433/ ; potentially deletes 6 nt across 3 codons to delete LDV and join 2 codons to create F	No	422	141
C	S	423	141	21985	7	1.566	G	gap	UUG-U--	L-	Deletion		Spike aa 142/143/144 deletion reported in Omicron; only aa 144 reported in Alpha https://www.ncbi.nlm.nih.gov/pmc/articles/PMC8386433/ ; potentially deletes 6 nt across 3 codons to delete LDV and join 2 codons to create F	No	423	141
C	S	424	142	21986	6	1.34228	G	gap	GGU- ---	G-	Deletion	Positive	Spike aa 142/143/144 deletion reported in Omicron; only aa 144 reported in Alpha https://www.ncbi.nlm.nih.gov/pmc/articles/PMC8386433/ ; potentially deletes 6 nt across 3 codons to delete LDV and join 2 codons to create F	No	424	142
C	S	425	142	21987	6	1.34228	G	gap	GGU- ---	G-	Deletion	Positive	Spike aa 142/143/144 deletion reported in Omicron; only aa 144 reported in Alpha https://www.ncbi.nlm.nih.gov/pmc/articles/PMC8386433/ ; potentially deletes 6 nt across 3 codons to delete LDV and join 2 codons to create F	No	425	142
C	S	425	142	21987	150	33.557	G	A	GGU-GAU	G-D	Non-synonymous	Positive	Expected Delta mutation; occurs in different genomes than the deeltions	No	425	142
C	S	426	142	21988	5	1.11857	U	gap	GGU- ---	G-	Deletion	Positive	Spike aa 142/143/144 deletion reported in Omicron; only aa 144 reported in Alpha https://www.ncbi.nlm.nih.gov/pmc/articles/PMC8386433/ ; potentially deletes 6 nt across 3 codons to delete LDV and join 2 codons to create F	No	426	142
C	S	427	143	21989	6	1.34228	G	gap	GUU- -UU	V-	Deletion		Spike aa 142/143/144 deletion reported in Omicron; only aa 144 reported in Alpha https://www.ncbi.nlm.nih.gov/pmc/articles/PMC8386433/ ; potentially deletes 6 nt across 3 codons to delete LDV and join 2 codons to create F	No	427	143
C	S	429	143	21991	23	5.14541	U	gap	GUU- GU-	V-	Deletion		Occurs in different genomes than the previous group of deletions at aa 142-144; 3 consecutive deletions at nt 429-431 joins 2 codons to delete Y and maintain V; Spike aa 142/143/144 deletion reported in Omicron; only aa 144 reported in Alpha https://www.ncbi.nlm.nih.gov/pmc/articles/PMC8386433/ ; potentially deletes 6 nt across 3 codons to delete LDV and join 2 codons to create F	No	429	143
C	S	430	144	21992	21	4.69799	U	gap	UAU- --U	Y-	Deletion		Occurs in different genomes than the previous group of deletions at aa 142-144; 3 consecutive deletions at nt 429-431 joins 2 codons to delete Y and maintain V; Spike aa 142/143/144 deletion reported in Omicron; only aa 144 reported in Alpha https://www.ncbi.nlm.nih.gov/pmc/articles/PMC8386433/ ; potentially deletes 6 nt across 3 codons to delete LDV and join 2 codons to create F	No	430	144
C	S	431	144	21993	21	4.69799	A	gap	UAU- --U	Y-	Deletion		Occurs in different genomes than the previous group of deletions at aa 142-144; 3 consecutive deletions at nt 429-431 joins 2 codons to delete Y and maintain V; Spike aa 142/143/144 deletion reported in Omicron; only aa 144 reported in Alpha https://www.ncbi.nlm.nih.gov/pmc/articles/PMC8386433/ ; potentially deletes 6 nt across 3 codons to delete LDV and join 2 codons to create F	No	431	144
C	S	460	154	22022	63	14.094	G	A	GAA-AAA	E-K	Non-synonymous	Positive		No	460	154
C	S	466	156	22028	76	17.0022	G	gap	GAG- ---	E-	Deletion		6nt expected Delta deletion at aa 156/157, some genomes start the gap 1nt earlier than expected to delete GAG,TTC and has n at the start of the 3rd codon. Expected deletion starts at nt 467 and joins 2 codons to create GGA, deletes EFR and creates G	No	466	156
C	S	467	156	22029	277	61.9687	A	gap	GAG- G--	E-	Deletion		Expected Delta mutation; 6nt expected Delta deletion at aa 156/157, some genomes start the gap 1nt earlier than expected to delete GAG,TTC and has n at the start of the 3rd codon. Expected deletion starts at nt 467 and joins 2 codons to create GGA, deletes EFR and creates G	No	467	156
C	S	468	156	22030	277	61.9687	G	gap	GAG- G--	E-	Deletion		Expected Delta mutation; 6nt expected Delta deletion at aa 156/157, some genomes start the gap 1nt earlier than expected to delete GAG,TTC and has n at the start of the 3rd codon. Expected deletion starts at nt 467 and joins 2 codons to create GGA, deletes EFR and creates G	No	468	156
C	S	469	157	22031	282	63.0872	U	gap	UUC- ---	F-	Deletion		Expected Delta mutation; 6nt expected Delta deletion at aa 156/157, some genomes start the gap 1nt earlier than expected to delete GAG,TTC and has n at the start of the 3rd codon. Expected deletion starts at nt 467 and joins 2 codons to create GGA, deletes EFR and creates G	No	469	157
C	S	470	157	22032	284	63.5347	U	gap	UUC- ---	F-	Deletion		Expected Delta mutation; 6nt expected Delta deletion at aa 156/157, some genomes start the gap 1nt earlier than expected to delete GAG,TTC and has n at the start of the 3rd codon. Expected deletion starts at nt 467 and joins 2 codons to create GGA, deletes EFR and creates G	No	470	157
C	S	471	157	22033	284	63.5347	C	gap	UUC- ---	F-	Deletion		Expected Delta mutation; 6nt expected Delta deletion at aa 156/157, some genomes start the gap 1nt earlier than expected to delete GAG,TTC and has n at the start of the 3rd codon. Expected deletion starts at nt 467 and joins 2 codons to create GGA, deletes EFR and creates G	No	471	157
C	S	472	158	22034	188	42.0582	A	gap	AGA- -GA	R-	Deletion		Expected Delta mutation; 6nt expected Delta deletion at aa 156/157, some genomes start the gap 1nt earlier than expected to delete GAG,TTC and has n at the start of the 3rd codon. Expected deletion starts at nt 467 and joins 2 codons to create GGA, deletes EFR and creates G	No	472	158
C	S	654	218	22216	5	1.11857	G	U	CAG-CAU	Q-H	Non-synonymous			No	654	218
C	S	663	221	22225	6	1.34228	G	A	UCG-UCA	S-S	Synonymous	Negative		No	663	221
C	S	665	222	22227	104	23.2662	C	U	GCU-GUU	A-V	Non-synonymous	Positive		No	665	222
C	S	1155	385	22717	8	1.78971	G	U	GUG-UUG	V-L	Non-synonymous			No	1144	382	Here onward, -11 for 11nt insertion at group C positions 756-766 (full genome = 22349-22359)
C	S	1366	456	22928	410	91.7226	U	G	CUG-CGG	L-R	Non-synonymous	Positive	Expected Delta mutation	No	1355	452
C	S	1444	482	23006	297	66.4429	C	A	ACA-AAA	T-K	Non-synonymous		Expected Delta mutation	No	1433	478
C	S	1461	487	23023	113	25.2796	G	C	GAA-CAA	E-Q	Non-synonymous	Positive		No	1450	484
C	S	1512	504	23074	25	5.59284	A	U	AAU-UAU	N-Y	Non-synonymous	Positive		No	1501	501
C	S	1720	574	23282	24	5.36913	C	A	GCU-GAU	A-D	Non-synonymous			No	1709	570
C	S	2053	685	23615	24	5.36913	C	A	CCU-CAU	P-H	Non-synonymous	Positive		No	2042	681
C	S	2053	685	23615	412	92.17	C	G	CCU-CGU	P-R	Non-synonymous	Positive	Expected Delta mutation	No	2042	681
C	S	2148	716	23710	6	1.34228	G	U	GCC-UCC	A-S	Non-synonymous			No	2137	713
C	S	2158	720	23720	23	5.14541	C	U	ACA-AUA	T-I	Non-synonymous			No	2147	716
C	S	2855	952	24417	5	1.11857	U	C	CUU-CUC	L-L	Synonymous			No	2844; 2869	948; 957	Here onward, 1st number is frameshift adjusted positions to match with group C FUBAR selection sites (where frameshifts are removed), -11 for 11nt insertion at group C positions 756-766 (full genome = 22349-22359); 2nd number is +4 for 4nt insertion at group A positions 2675-2678 (full genome = 24268-24271) and +21 for 21nt insertion at group A positions 2183-2203 (full genome = 23776-23796)
C	S	2859	953	24421	159	35.5705	G	A	GAU-AAU	D-N	Non-synonymous	Positive	Expected Delta mutation	No	2848; 2873	950; 958
C	S	2924	975	24486	6	1.34228	U	G	GGU-GGG	G-G	Synonymous			No	2913; 2938	971; 980
C	S	2955	985	24517	24	5.36913	U	G	UCA-GCA	S-A	Non-synonymous			No	2944; 2969	982; 990
C	S	3194	1065	24756	52	11.6331	C	U	GUC-GUU	V-V	Synonymous	Negative		No	3183; 3208	1061; 1070
C	S	3224	1075	24786	78	17.4497	A	U	CAA-CAU	Q-H	Non-synonymous			No	3213; 3238	1071; 1080
C	S	3312	1104	24874	39	8.72483	C	G	CAC-GAC	H-D	Non-synonymous			No	3301; 3326	1101; 1109
C	S	3363	1121	24925	23	5.14541	G	C	GAC-CAC	D-H	Non-synonymous			No	3352; 3377	1118; 1126
C	S	3433	1145	24995	5	1.11857	U	G	UUG-UGG	L-W	Non-synonymous			No	3422; 3447	1141; 1149
C	S	3468	1156	25030	7	1.566	G	U	GAU-UAU	D-Y	Non-synonymous			No	3457; 3482	1153; 1161
C	S	3801	1267	25363	6	1.34228	G	U	GUG-UUG	V-L	Non-synonymous	Positive		No	3790; 3815	1264; 1272
A	ORF3a	154	52	25602	6	1.03627	C	A	CUU-AUU	L-I	Non-synonymous			No
B	ORF3a	157	53	25549	8	1.44404	C	U	CUU-UUU	L-F	Non-synonymous			No
B	ORF3a	164	55	25556	7	1.26354	U	G	GUU-GGU	V-G	Non-synonymous			No
B	ORF3a	193	65	25585	10	1.80505	C	U	CUC-UUC	L-F	Non-synonymous			No
B	ORF3a	301	101	25693	13	2.34657	C	U	CUU-UUU	L-F	Non-synonymous			No
B	ORF3a	544	182	25936	6	1.08303	G	A	GAA-AAA	E-K	Non-synonymous	Positive		No	541	181	Here onward, -3 for 3nt insertion at group B positions 308-310 (full genome = 25700-25702)
B	ORF3a	607	203	25999	6	1.08303	G	U	GUA-UUA	V-L	Non-synonymous	Negative		No	604	202
B	ORF3a	671	224	26063	14	2.52708	C	U	ACU-AUU	T-I	Non-synonymous			No	668	223
B	ORF3a	784	262	26176	51	9.20578	G	U	GAA-UAA	E-stop	Non-synonymous		Premature stop codon	No	781	261
C	ORF3a	77	26	25480	409	91.4989	C	U	UCA-UUA	S-L	Non-synonymous	Positive	Expected Delta mutation	No			No indels in group C, positions are the same
C	ORF3a	629	210	26032	6	1.34228	A	G	GAC-GGC	D-G	Non-synonymous			No
C	ORF3a	670	224	26073	8	1.78971	G	U	GGU-UGU	G-C	Non-synonymous			No
A	E	107	36	26407	8	1.38169	C	gap	GCG-G--	A-	Deletion		Deletion 26407-26410 found in same genomes, 5th deletion can appear on either side flanking (4 core deletions pass the 1% threshold) and often followed by an n so unlikely that this causes a frameshift. Resulting substitution would be genome specific since the deletion shifts slightly between genomes	No
A	E	108	36	26408	8	1.38169	G	gap	GCG-G--	A-	Deletion		Deletion 26407-26410 found in same genomes, 5th deletion can appear on either side flanking (4 core deletions pass the 1% threshold) and often followed by an n so unlikely that this causes a frameshift. Resulting substitution would be genome specific since the deletion shifts slightly between genomes	No
A	E	109	37	26409	7	1.20898	C	gap	CUU- --U	L-	Deletion		Deletion 26407-26410 found in same genomes, 5th deletion can appear on either side flanking (4 core deletions pass the 1% threshold) and often followed by an n so unlikely that this causes a frameshift. Resulting substitution would be genome specific since the deletion shifts slightly between genomes	No
A	E	110	37	26410	7	1.20898	U	gap	CUU- --U	L-	Deletion		Deletion 26407-26410 found in same genomes, 5th deletion can appear on either side flanking (4 core deletions pass the 1% threshold) and often followed by an n so unlikely that this causes a frameshift. Resulting substitution would be genome specific since the deletion shifts slightly between genomes	No
C	E	184	62	26439	5	1.11857	G	U	GUU-UUU	V-F	Non-synonymous			No			No indels in any group, positions are equivalent
A	M	208	70	26786	6	1.03627	G	U	GUU-UUU	V-F	Non-synonymous			No
B	M	300	100	26825	11	1.98556	C	U	UUC-UUU	F-F	Synonymous			No
B	M	588	196	27113	7	1.26354	C	U	UAC-UAU	Y-Y	Synonymous			No
C	M	159	53	26692	68	15.2125	C	U	UUC-UUU	F-F	Synonymous	Negative		No			No indels in any group, positions are equivalent
C	M	245	82	26778	61	13.6465	U	G	AUC-AGC	I-S	Non-synonymous	Positive		No
C	M	245	82	26778	298	66.6667	U	C	AUC-ACC	I-T	Non-synonymous	Positive	Expected Delta mutation	No
B	ORF6	12	4	27216	6	1.08303	C	U	CUC-CUU	L-L	Synonymous			No			No indels in any group, positions are equivalent
C	ORF6	98	33	27310	47	10.5145	U	C	AUA-ACA	I-T	Non-synonymous			No			No indels in any group, positions are equivalent
A	ORF7a	310	104	27759	6	1.03627	G	U	GUU-UUU	V-F	Non-synonymous			No
C	ORF7a	245	82	27649	412	92.17	U	C	GUU-GCU	V-A	Non-synonymous		Expected Delta mutation	No			No indels in any group, positions are equivalent
C	ORF7a	346	116	27750	121	27.0694	C	U	CUC-UUC	L-F	Non-synonymous		Expected Delta mutation	No
C	ORF7a	357	119	27761	7	1.566	G	U	AAG-AAU	K-N	Non-synonymous			No
C	ORF7a	359	120	27763	298	66.6667	C	U	ACA-AUA	T-I	Non-synonymous	Positive	Expected Delta mutation	No
B	ORF7b	7	3	27765	8	1.44404	G	C	GAA-CAA	E-Q	Non-synonymous			No
C	ORF7b	119	40	27885	45	10.0671	C	U	ACU-AUU	T-I	Non-synonymous			No			No indels in any group, positions are equivalent
A	ORF8	251	84	28200	30	5.18135	U	C	UUA-UCA	L-S	Non-synonymous			No
A	ORF8	328	110	28277	11	1.89983	G	U	GAG-UAG	E-stop	Non-synonymous		Premature stop codon	No
B	ORF8	184	62	28080	16	2.88809	G	U	GUG-UUG	V-L	Non-synonymous			No
B	ORF8	290	97	28186	51	9.20578	G	U	AGU-AUU	S-I	Non-synonymous			No
C	ORF8	108	36	28012	6	1.34228	G	U	CCG-CCU	P-P	Synonymous			No
C	ORF8	155	52	28059	24	5.36913	G	U	AGA-AUA	R-I	Non-synonymous			No
C	ORF8	200	67	28104	6	1.34228	C	U	UCU-UUU	S-F	Non-synonymous			No
C	ORF8	202	68	28106	9	2.01342	A	U	AAA-UAA	K-stop	Non-synonymous		Premature stop codon, but all occurences are in the same genomes that already had a premature stop codon at aa27. Still recording as a mutation because it is within the ORF8 reading frame but biologically it is nonsensical (gene does not re-start with new M after the aa27 stop)	No
C	ORF8	206	69	28110	17	3.80313	C	U	UCA-UUA	S-L	Non-synonymous			No
C	ORF8	218	73	28122	24	5.36913	A	G	UAC-UGC	Y-C	Non-synonymous			No
C	ORF8	354	118	28258	7	1.566	A	gap	UUA-UU-	L-	Deletion		Expected 6nt Delta deletion aa119-120, but some genomes have the deletion shifted earlier, probably an alignment error because its around a region of a lot of consecutive T's, but can't assume that it isnt a true shift. Deletion shifted back would delete LD and join 2 codons to maintain V at aa118	No
C	ORF8	355	119	28259	250	55.9284	G	gap	GAU- ---	D-	Deletion		Expected Delta mutation; expected 6nt Delta deletion aa119-120	No
C	ORF8	356	119	28260	248	55.481	A	gap	GAU- ---	D-	Deletion		Expected Delta mutation; expected 6nt Delta deletion aa119-120	No
C	ORF8	357	119	28261	245	54.8098	U	gap	GAU- ---	D-	Deletion		Expected Delta mutation; expected 6nt Delta deletion aa119-120	No
C	ORF8	358	120	28262	245	54.8098	U	gap	UUC- ---	F-	Deletion		Expected Delta mutation; expected 6nt Delta deletion aa119-120	No
C	ORF8	359	120	28263	245	54.8098	U	gap	UUC- ---	F-	Deletion		Expected Delta mutation; expected 6nt Delta deletion aa119-120	No
C	ORF8	360	120	28264	156	34.8993	C	gap	UUC- ---	F-	Deletion		Expected Delta mutation; expected 6nt Delta deletion aa119-120	No
C	ORF8	360	120	28264	9	2.01342	C	A	UUC-UUA	F-L	Non-synonymous			No
C	ORF8	360	120	28264	30	6.71141	C	U	UUC-UUU	F-F	Synonymous			No
A	N	38	13	28367	103	17.7893	C	U	CCC-CUC	P-L	Non-synonymous	Positive		No
A	N	53	18	28382	10	1.72712	G	U	GGU-GUU	G-V	Non-synonymous			No
A	N	415	139	28744	7	1.20898	U	C	UUG-CUG	L-L	Synonymous	Negative		No
A	N	595	199	28924	6	1.03627	C	U	CCA-UCA	P-S	Non-synonymous			No
A	N	605	202	28934	30	5.18135	G	A	AGU-AAU	S-N	Non-synonymous	Positive		No
A	N	804	268	29133	6	1.03627	C	U	UAC-UAU	Y-Y	Synonymous			No
B	N	4	2	28280	48	8.66426	U	C	UCU-CCU	S-P	Non-synonymous			No			No indels in any group, positions are equivalent
B	N	18	6	28294	10	1.80505	C	U	CCC-CCU	P-P	Synonymous			No
B	N	48	16	28324	6	1.08303	C	U	ACG-ACU	T-T	Synonymous			No
B	N	255	85	28531	8	1.44404	C	U	GGC-GGU	G-G	Synonymous			No
B	N	382	128	28658	10	1.80505	G	U	GAC-UAC	D-Y	Non-synonymous			No
B	N	608	203	28884	16	2.88809	G	gap	AGG-A--	Deletion	Deletion		28884-28885 gap occurs together, "--n" so unlikely that this causes a frameshift. would join together 2 codons to make AGA which causes a synonymous mutation R-R	No
B	N	609	203	28885	16	2.88809	G	gap	AGG-A--	Deletion	Deletion		28884-28885 gap occurs together, "--n" so unlikely that this causes a frameshift. would join together 2 codons to make AGA which causes a synonymous mutation R-R	No
B	N	614	205	28890	8	1.44404	C	U	ACU-AUU	T-I	Non-synonymous			No
C	N	7	3	28291	16	3.57942	G	U	GAU-UAU	D-Y	Non-synonymous	Positive	Occurs in different genomes than the 3nt mutation at nt 7-9	No			No indels in any group, positions are equivalent
C	N	7	3	28291	21	4.69799	G	C	GAU-CUA	D-L	Non-synonymous	Positive	28291/28292/28293 always seen as change from GAU-CUA together	No
C	N	8	3	28292	21	4.69799	A	U	GAU-CUA	D-L	Non-synonymous	Positive	28291/28292/28293 always seen as change from GAU-CUA together	No
C	N	9	3	28293	21	4.69799	U	A	GAU-CUA	D-L	Non-synonymous	Positive	28291/28292/28293 always seen as change from GAU-CUA together	No
C	N	103	35	28387	5	1.11857	G	U	GCG-UCG	A-S	Non-synonymous	Positive		No
C	N	136	46	28420	6	1.34228	C	U	CCC-UCC	P-S	Non-synonymous			No
C	N	188	63	28472	267	59.7315	A	G	GAC-GGC	D-G	Non-synonymous	Positive	Expected Delta mutation	No
C	N	519	173	28803	6	1.34228	A	G	GCA-GCG	A-A	Synonymous			No
C	N	608	203	28892	412	92.17	G	U	AGG-AUG	R-M	Non-synonymous		Expected Delta mutation; occurs in different genomes than the 3nt mutation at nt 608-610	No
C	N	622	208	28906	6	1.34228	G	U	GCU-UCU	A-S	Non-synonymous			No
C	N	643	215	28927	44	9.8434	G	U	GGU-UGU	G-C	Non-synonymous			No
C	N	704	235	28988	23	5.14541	C	U	UCU-UUU	S-F	Non-synonymous	Positive		No
C	N	981	327	29265	6	1.34228	G	U	UCG-UCU	S-S	Synonymous			No
C	N	1085	362	29369	21	4.69799	C	U	ACA-AUA	T-I	Non-synonymous			No
C	N	1129	377	29413	410	91.7226	G	U	GAU-UAU	D-Y	Non-synonymous		Expected Delta mutation	No
C	N	1154	385	29438	56	12.528	G	A	AGA-AAA	R-K	Non-synonymous		Expected Delta mutation	No
B	ORF10	91	31	29651	7	1.26354	U	G	GAU-UAU	D-Y	Non-synonymous			No			Only group with mutations, no comparisons are made
